# Supplementary material for: Extracellular palladium-catalysed dealkylation of 5-fluoro-1-propargyl-uracil as a bioorthogonally activated prodrug approach
Source: Springer Nature journal article supplement (doi:10.1038/ncomms4277), 2014-02-13
Supplement: 41467_2014_BFncomms4277_MOESM5_ESM.mol [file 41467_2014_BFncomms4277_MOESM5_ESM.mol]

  ChemDraw01291406512D

 16 17  0  0  0  0  0  0  0  0999 V2000
   -1.0717    0.4125    0.0000 C   0  0  0  0  0  0  0  0  0  0  0  0
   -0.3572    0.0000    0.0000 N   0  0  0  0  0  0  0  0  0  0  0  0
    0.3572    0.4125    0.0000 C   0  0  0  0  0  0  0  0  0  0  0  0
    0.3572    1.2375    0.0000 C   0  0  0  0  0  0  0  0  0  0  0  0
   -0.3572    1.6500    0.0000 C   0  0  0  0  0  0  0  0  0  0  0  0
   -1.0717    1.2375    0.0000 N   0  0  0  0  0  0  0  0  0  0  0  0
   -0.3572    2.4750    0.0000 O   0  0  0  0  0  0  0  0  0  0  0  0
   -1.7862    0.0000    0.0000 O   0  0  0  0  0  0  0  0  0  0  0  0
    1.0717    1.6500    0.0000 F   0  0  0  0  0  0  0  0  0  0  0  0
   -0.3572   -0.8250    0.0000 C   0  0  0  0  0  0  0  0  0  0  0  0
    0.3572   -1.2375    0.0000 C   0  0  0  0  0  0  0  0  0  0  0  0
    0.3572   -2.0625    0.0000 C   0  0  0  0  0  0  0  0  0  0  0  0
    1.0717   -2.4750    0.0000 C   0  0  0  0  0  0  0  0  0  0  0  0
    1.7862   -2.0625    0.0000 C   0  0  0  0  0  0  0  0  0  0  0  0
    1.7862   -1.2375    0.0000 C   0  0  0  0  0  0  0  0  0  0  0  0
    1.0717   -0.8250    0.0000 C   0  0  0  0  0  0  0  0  0  0  0  0
  1  2  1  0      
  2  3  1  0      
  3  4  2  0      
  4  5  1  0      
  5  6  1  0      
  6  1  1  0      
  5  7  2  0      
  1  8  2  0      
  4  9  1  0      
  2 10  1  0      
 10 11  1  0      
 11 12  2  0      
 12 13  1  0      
 13 14  2  0      
 14 15  1  0      
 15 16  2  0      
 16 11  1  0      
M  END
